# Supplementary material for: Monitoring of Seasonal Under-Vine CO2 Effluxes in a Vineyard under Different Fertilization Practices
Source: MDPI journal article supplement (doi:10.3390/horticulturae9101107), 2023-10-06
Supplement: s1 [file horticulturae-2530643-supplementary.pdf › horticulturae-2530643-supplementary.pdf]

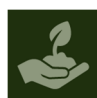

# Supplementary Material: Monitoring of Seasonal Under-Vine CO<sub>2</sub> Effluxes in a Vineyard under Different Fertilization Practices

Pasquale Cirigliano, Andrea Cresti, Andrea Rengo, Mauro Eugenio Maria D'Arcangelo and Elena Brunori

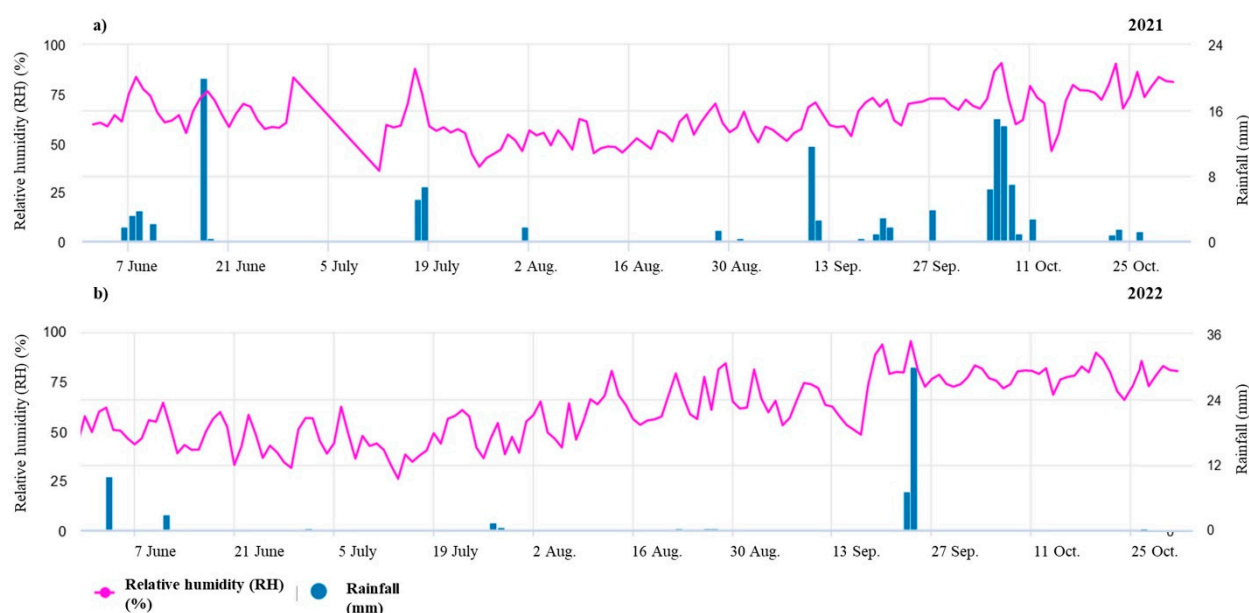

**Figure S1.** Relative humidity (%) and rainfall (mm) during the two consecutive season 2021 and 2022 in Italian rainfed tested vineyard. Data were obtained by a *in situ* weather station.

| EZO-CO2 Embedded Carbon Dioxide Sensor |                         |
|----------------------------------------|-------------------------|
| Reads                                  | Gaseous CO <sub>2</sub> |
| Range                                  | 0 – 10,000 ppm          |
| Calibration                            | Factory calibrated      |
| Pressure                               | Atmosphere only         |
| Response time                          | 1 reading per second    |
| Resolution                             | 1 ppm                   |
| Accuracy                               | (+/- 5%) + (+/- 50 ppm) |
| Connector                              | 5 lead data cable       |
| Warmup time                            | 10 seconds              |
| Cable length                           | 1 meter                 |
| Data protocol                          | UART & I2C              |
| Default I2C address                    | 105 (0x69)              |
| Data format                            | ASCII                   |
| Operating voltage                      | 3.3V – 5V               |
| Life expectancy                        | ~5.5 years              |

**Figure S2.** Technical sheet of the sensor used for the detection of CO<sub>2</sub>.

| <b>SHT-10 Mesh-protected Weather-proof Temperature/Humidity Sensor</b> |                          |
|------------------------------------------------------------------------|--------------------------|
| Body dimensions                                                        | 14mm diameter, 50mm long |
| Cable length                                                           | 1 meter                  |
| Humidity readings                                                      | 4.5% accuracy            |
| Temperature readings                                                   | 0.5°C accuracy           |
| Working Temperature/Humidity range                                     | -40°C ~ 120°C, 0~100% RH |

**Figure S3.** Technical sheet of the sensor used for the detection of temperature and moisture of the soil.

| <b>AGROFERT MB Composition</b>                                       |        |
|----------------------------------------------------------------------|--------|
| Total NITROGEN (N) of which: 1.0% organic - 6.2% ammonia - 2.8% urea | 10.00% |
| Total PHOSPHORIC ANHYDRIDE (P <sub>2</sub> O <sub>5</sub> )          | 5.00%  |
| POTASSIUM OXIDE (K <sub>2</sub> O) Soluble in water                  | 15.00% |
| Total MAGNESIUM OXIDE (MgO)                                          | 3.00%  |
| Total SULPHURIC ANHYDRIDE (SO <sub>3</sub> )                         | 14.00% |
| Total BORON (B)                                                      | 0.05%  |
| Total IRON (Fe)                                                      | 0.50%  |
| Total ZINC (Zn)                                                      | 0.01%  |
| ORGANIC CARBON C                                                     | 7.50%  |
| ORGANIC CARBON (C) HUMIC AND FULVIC ACIDS (HA+FA)                    | 3.00%  |
| HUMIFICATION RATE (HR)                                               | 40.00% |

**Figure S4.** Technical sheet of the fertilizer used for treatment in spring.

| <b>BELFRUTTO MB Composition</b>                             |        |
|-------------------------------------------------------------|--------|
| Total NITROGEN (N) of which: 1.0% organic - 4% ammonia      | 5.00%  |
| Total PHOSPHORIC ANHYDRIDE (P <sub>2</sub> O <sub>5</sub> ) | 10.00% |
| POTASSIUM OXIDE (K <sub>2</sub> O) Soluble in water         | 15.00% |
| Total MAGNESIUM OXIDE (MgO)                                 | 5.00%  |
| Total SULPHURIC ANHYDRIDE (SO <sub>3</sub> )                | 5.00%  |
| Total BORON (B)                                             | 0.10%  |
| Total IRON (Fe)                                             | 0.70%  |
| Total ZINC (Zn)                                             | 0.01%  |
| ORGANIC CARBON C                                            | 7.50%  |
| ORGANIC CARBON (C) HUMIC AND FULVIC ACIDS (HA+FA)           | 3.00%  |
| HUMIFICATION RATE (HR)                                      | 40.00% |

**Figure S5.** Technical sheet of the fertilizer used for treatment in autumn.

**Table S1.** Generalized linear mixed-effect models of changes in CO<sub>2</sub> fluxes, soil temperature (Ts) and soil moisture (Rh – relative humidity %) over time (2021 and 2022 seasons).

| <b>2021</b>           | Effects   | Num DF  | F Value  | P value  |
|-----------------------|-----------|---------|----------|----------|
| <b>CO<sub>2</sub></b> | Treatment | 79      | 2.056256 | 0.001    |
| <b>Ts</b>             | Treatment | 79      | 12.19611 | < 0.0001 |
| <b>Rh</b>             | Treatment | 79      | 1.474217 | 0.043    |
| <b>2022</b>           | Effects   | Num GDL | F        | Pr > F   |
| <b>CO<sub>2</sub></b> | Treatment | 76      | 13.419   | < 0.0001 |
| <b>Ts</b>             | Treatment | 76      | 118.9841 | < 0.0001 |
| <b>Rh</b>             | Treatment | 76      | 5.464892 | < 0.0001 |
